# Supplementary material
Source: MDPI journal article supplement (https://www.mdpi.com/2073-4344/12/10/1111)
Supplement: s1 [file s1]

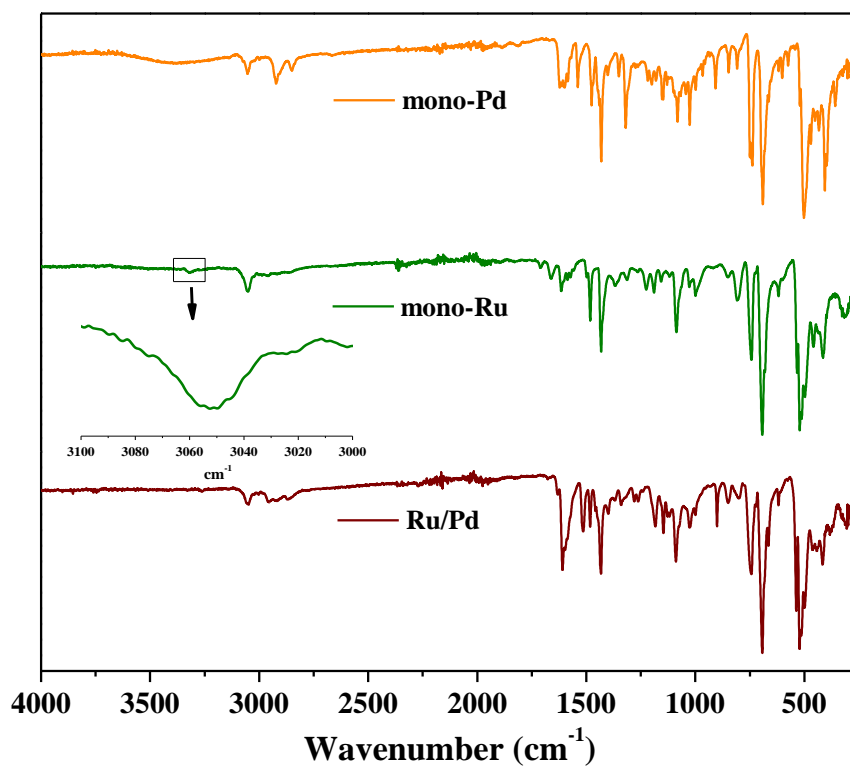

**Figure S1.** FTIR spectra of complexes mono-Pd, mono-Ru and Ru/Pd.

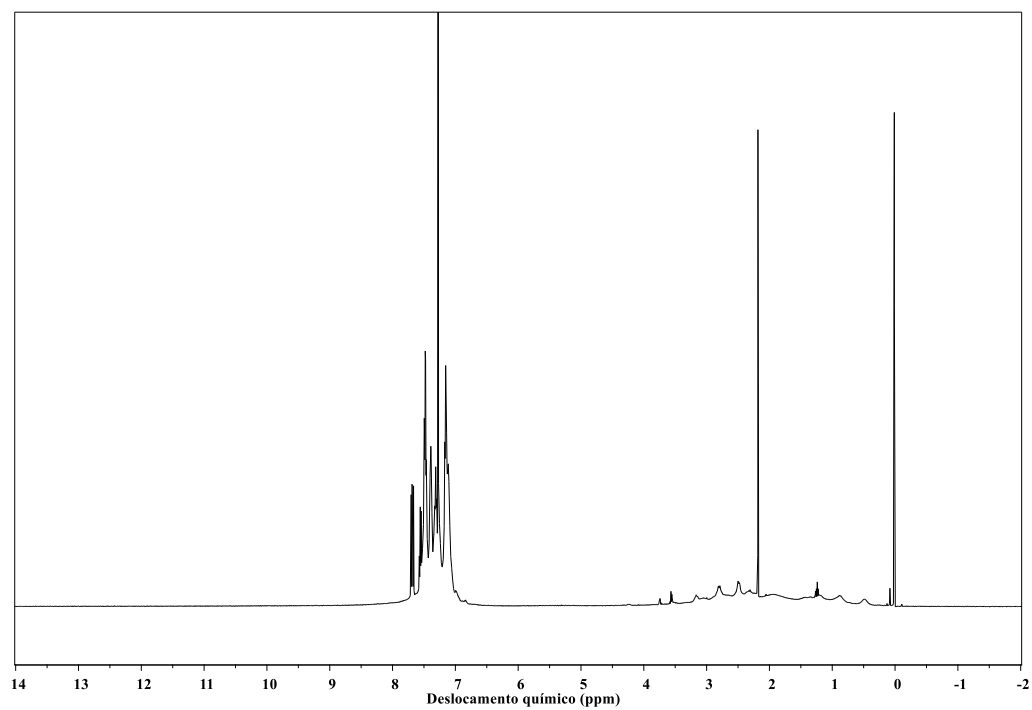

**Figure S2.**  $^1\text{H}$  NMR spectrum of mono-Ru in  $\text{CDCl}_3$ .

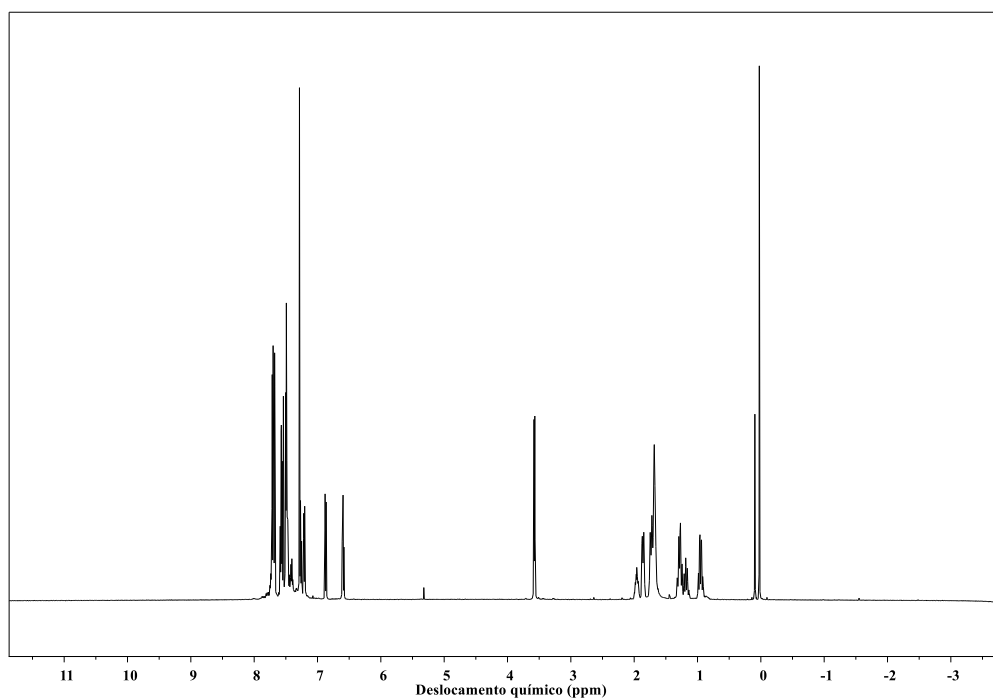

**Figure S3.**  $^1\text{H}$  NMR spectrum of mono-Pd in  $\text{CDCl}_3$ .

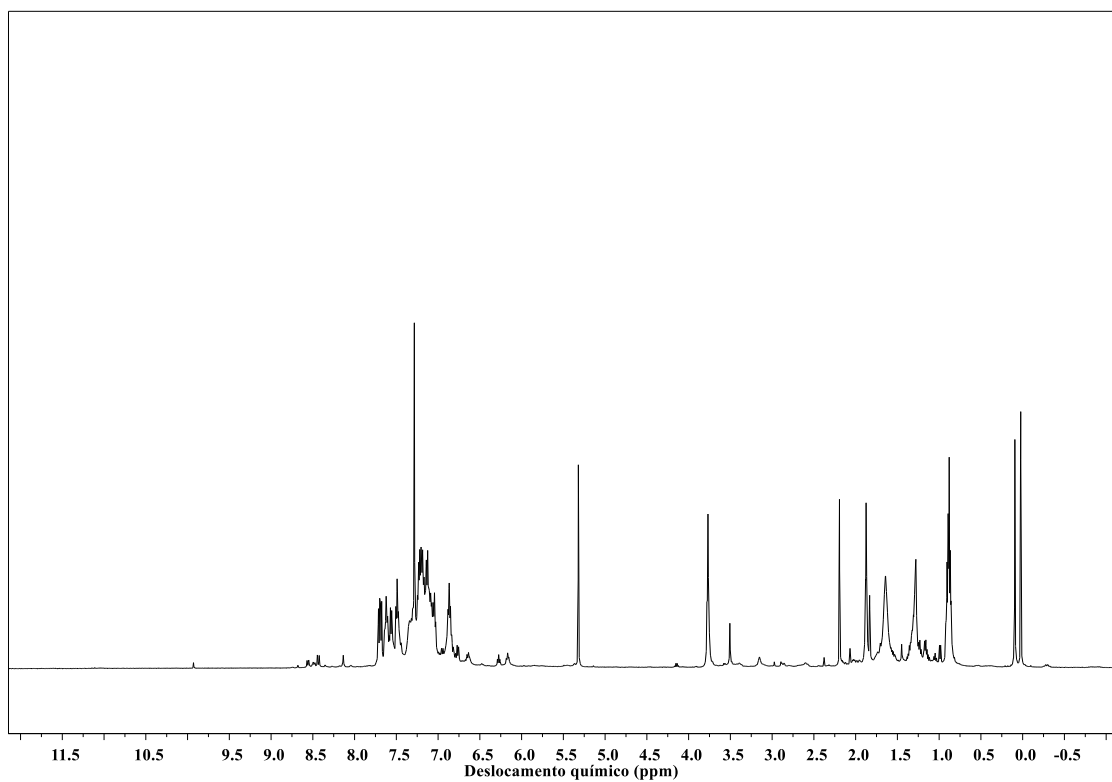

**Figure S4.**  $^1\text{H}$  NMR spectrum of Ru/Pd in  $\text{CDCl}_3$ .

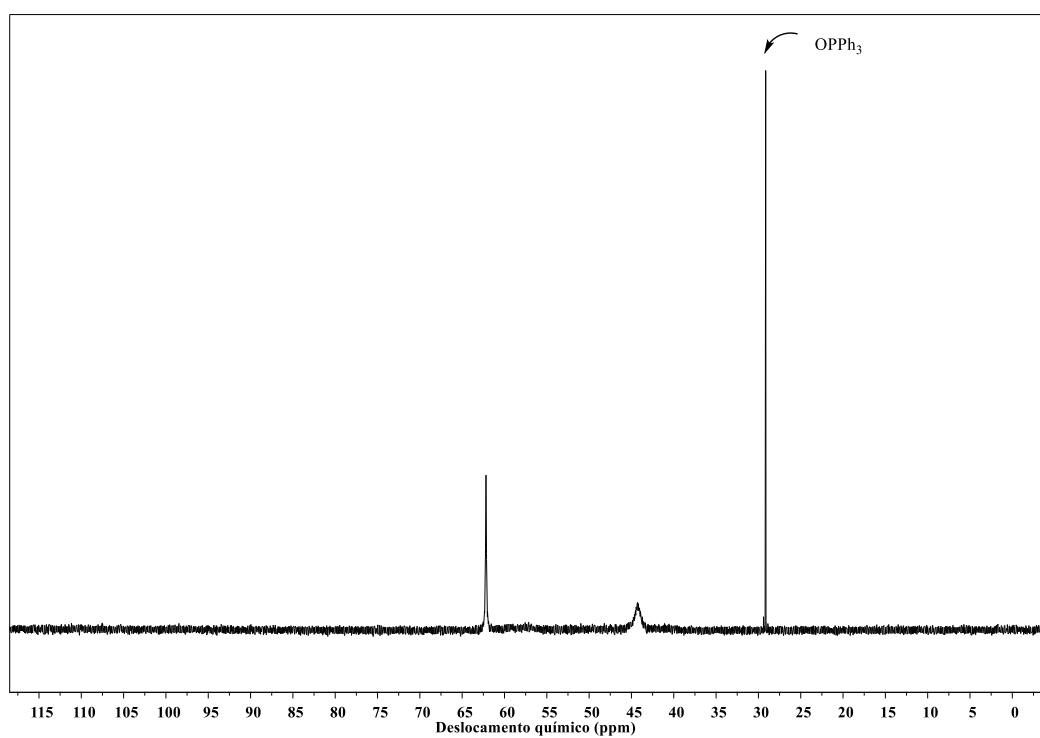

**Figure S5.**  $^{31}\text{P}\{^1\text{H}\}$  NMR spectrum of mono-Ru in  $\text{CDCl}_3$ .

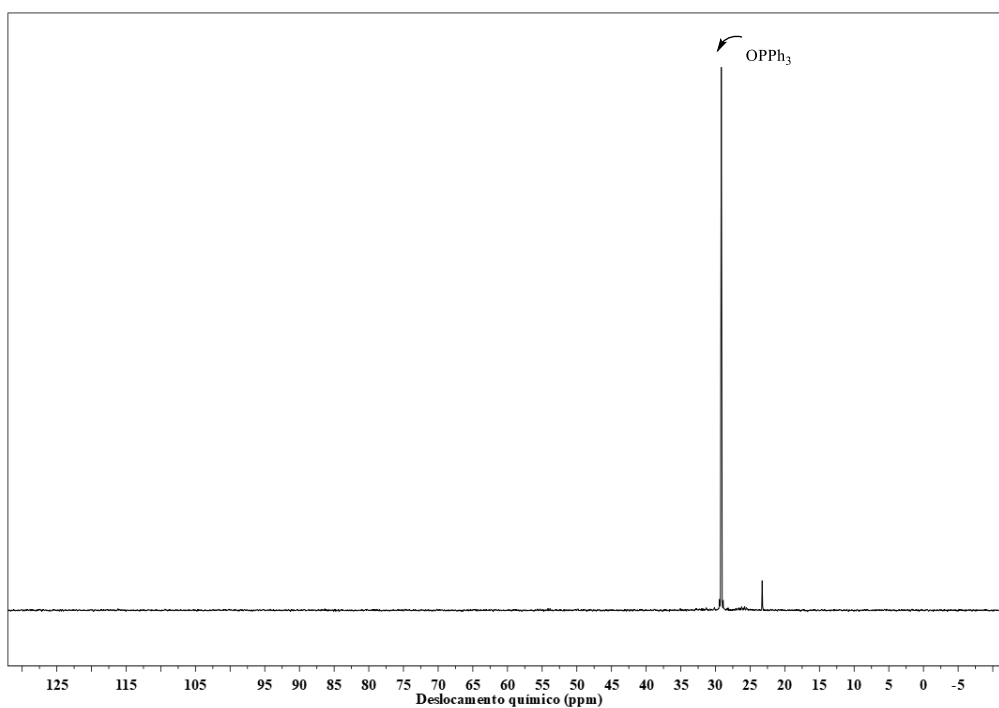

**Figure S6.**  $^{31}\text{P}\{^1\text{H}\}$  NMR spectrum of mono-Pd in  $\text{CDCl}_3$ .

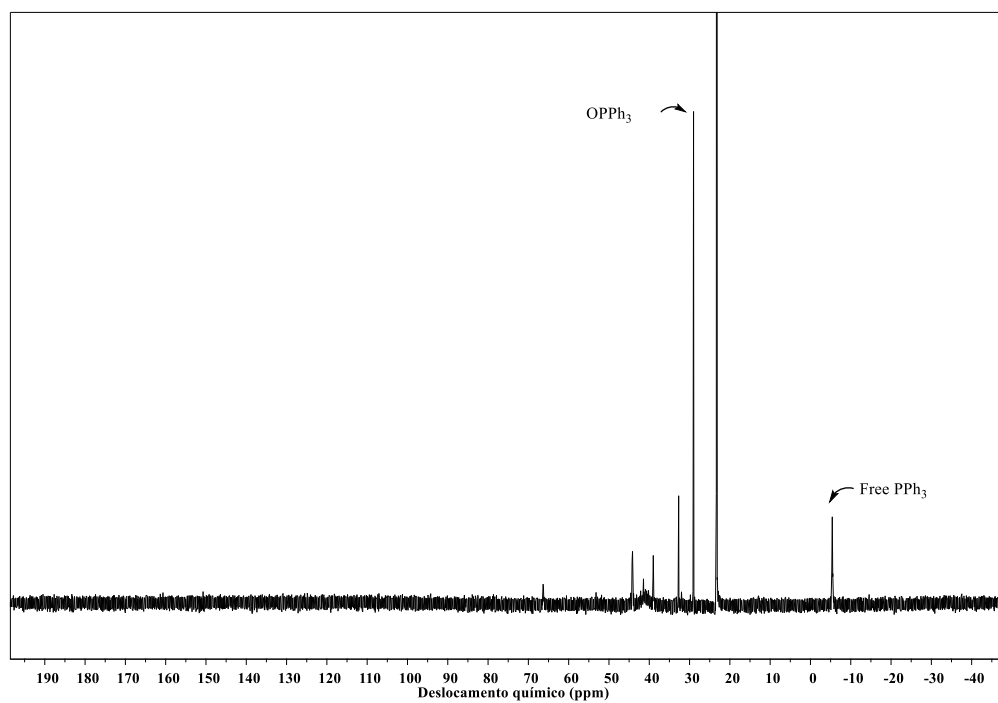

**Figure S7.**  $^{31}\text{P}\{^1\text{H}\}$  NMR spectrum of mono-Ru in  $\text{CDCl}_3$ .

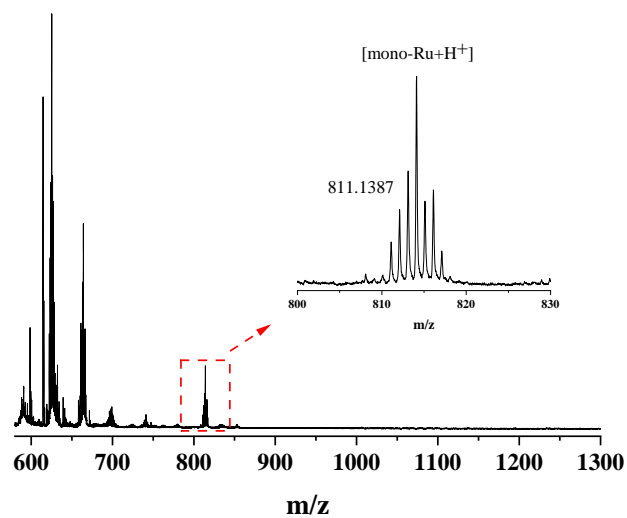

**Figure S8.** MALDI-TOF spectroscopy of mono-Ru from CH<sub>2</sub>Cl<sub>2</sub> solution. Matrix:  $\alpha$ -cyano-4-hydroxycinnamic acid.

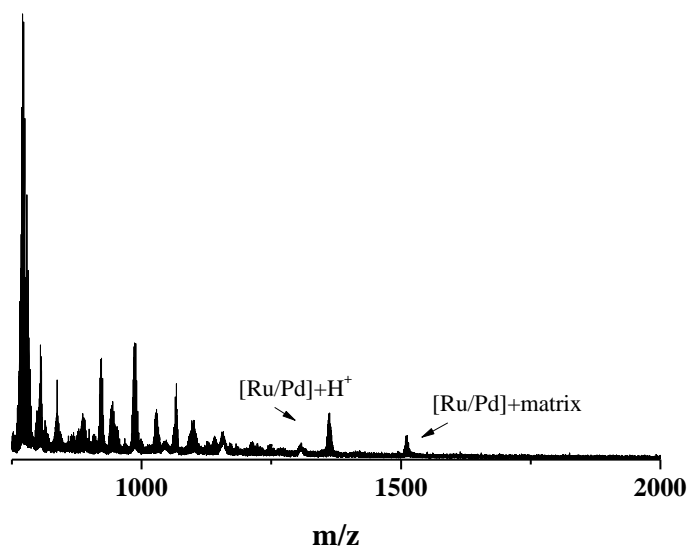

**Figure S9.** MALDI-TOF spectroscopy of Ru/Pd from CH<sub>2</sub>Cl<sub>2</sub> solution. Matrix:  $\alpha$ -cyano-4-hydroxycinnamic acid.

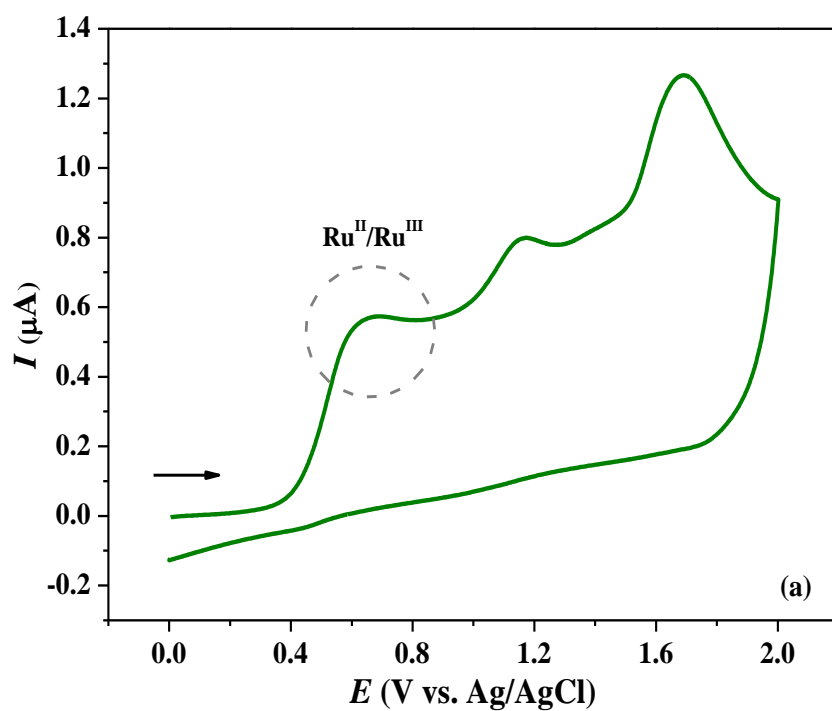

**Figure S10.** Cyclic voltammograms of mono-Ru from CH<sub>2</sub>Cl<sub>2</sub> solutions at 25 °C. Scanning anodically from 1.0 to 2.0 V at scan rate of 100 mV s<sup>-1</sup>. [mono-Ru] = 1.0 mmol L<sup>-1</sup>; [*n*-Bu<sub>4</sub>NPF<sub>6</sub>] = 0.1 mol L<sup>-1</sup>.

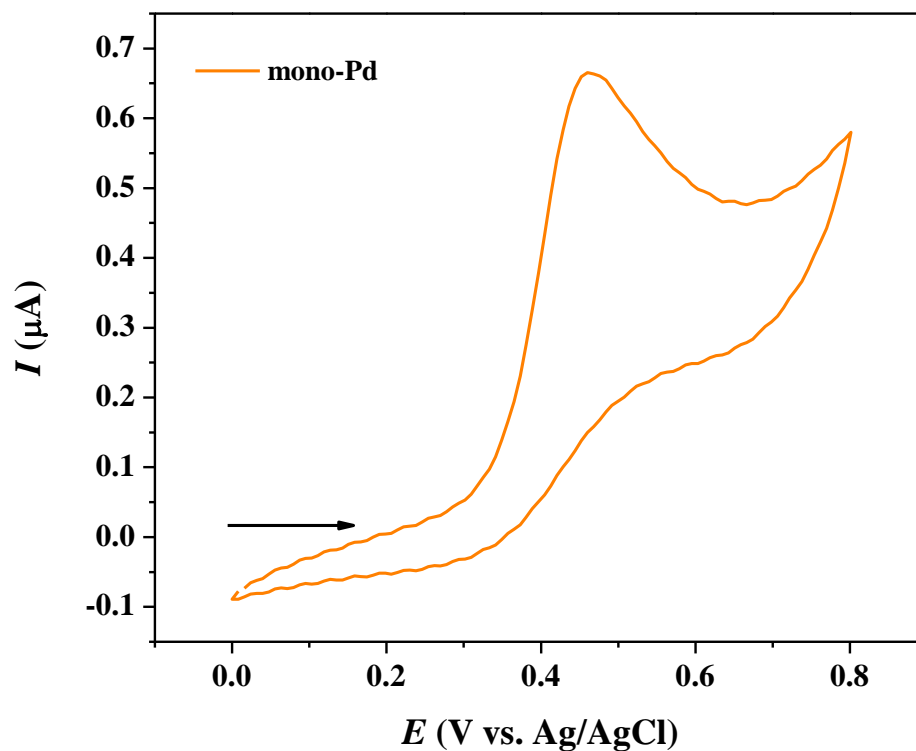

**Figure S11.** Cyclic voltammograms of mono-Pd from  $\text{CH}_2\text{Cl}_2$  solutions at 25 °C. Scanning anodically from 0.0 to 0.8 V at scan rate of  $100 \text{ mV s}^{-1}$ .  $[\text{mono-Pd}] = 1.0 \text{ mmol L}^{-1}$ ;  $[n\text{-Bu}_4\text{NPF}_6] = 0.1 \text{ mol L}^{-1}$ .

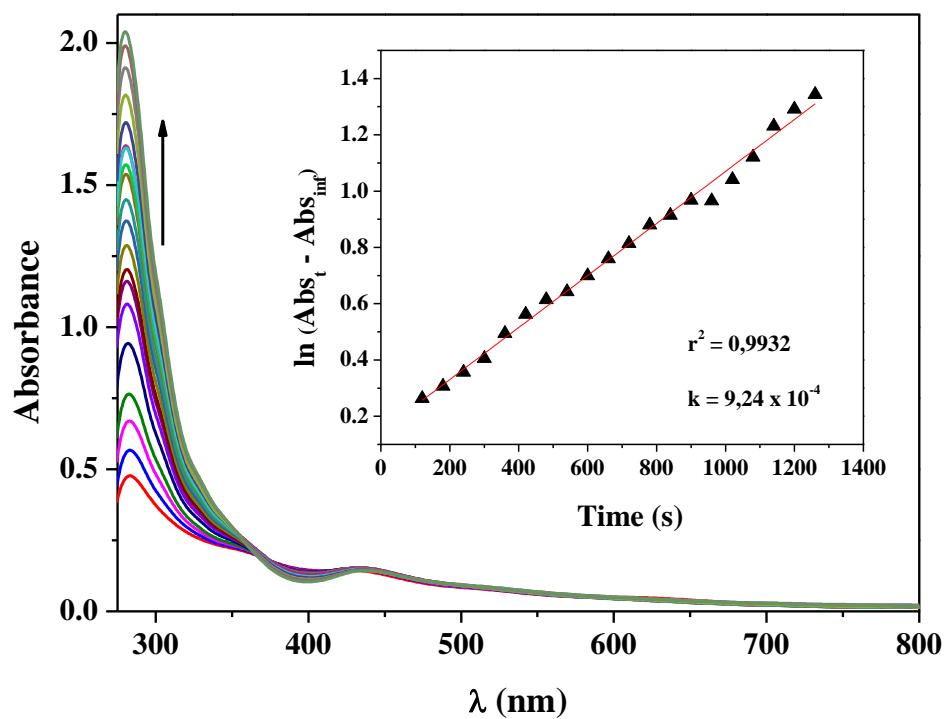

**Figure S12.** Kinetic study of mono-Ru in presence of EDA monitored by electronic spectroscopy every 30 seconds and (*insert*) dependence of  $\ln(\text{Abs}_t - \text{Abs}_{\text{inf}})$  as a function of time at 316 nm.  $[\text{Ru}] = 1.0 \times 10^{-5} \text{ mol L}^{-1}$ ;  $[\text{EDA}] = 1.26 \times 10^{-5} \text{ mol L}^{-1}$  in  $\text{CH}_2\text{Cl}_2$  and 25 °C.



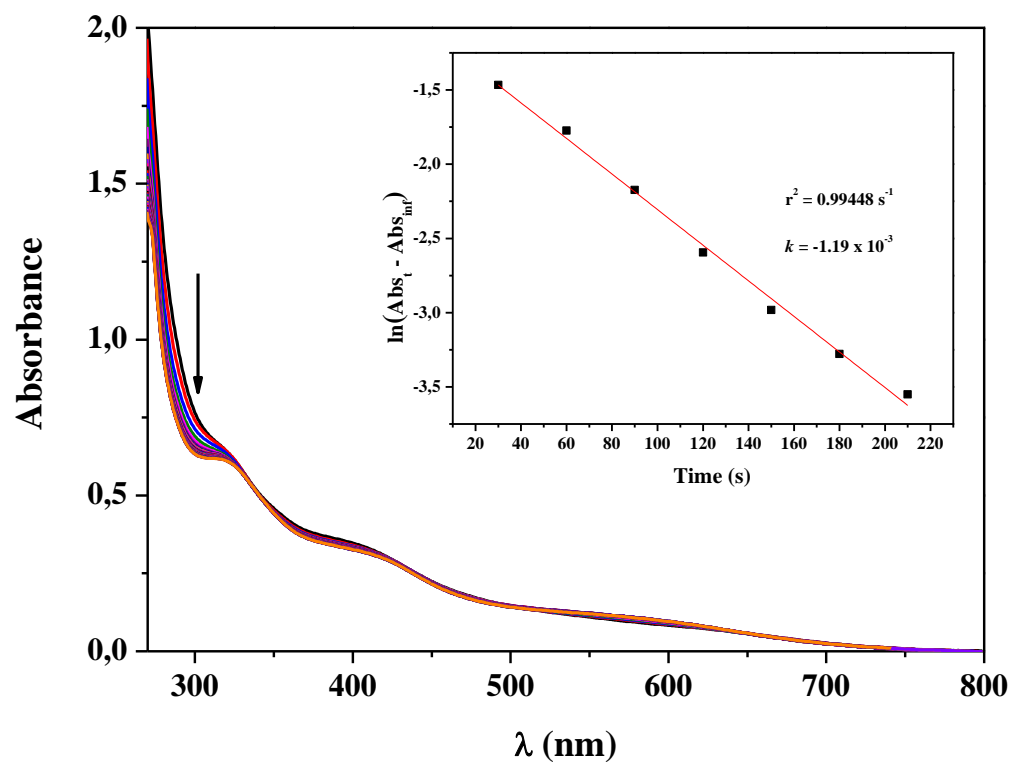

**Figure S13.** Kinetic study of Ru/Pd in presence of EDA monitored by electronic spectroscopy every 30 seconds and (*insert*) dependence of  $\ln(\text{Abs}_t - \text{Abs}_{\text{inf}})$  as a function of time at 297 nm.  $[\text{Ru}] = 1.0 \times 10^{-5} \text{ mol L}^{-1}$ ;  $[\text{EDA}] = 1.26 \times 10^{-5} \text{ mol L}^{-1}$  in  $\text{CH}_2\text{Cl}_2$  and 25 °C.
